# Supplementary material for: Heat Stress Perception among Native and Migrant Workers in Italian Industries—Case Studies from the Construction and Agricultural Sectors
Source: MDPI journal article supplement (doi:10.3390/ijerph16071090), 2019-03-27
Supplement: s1 [file s1]

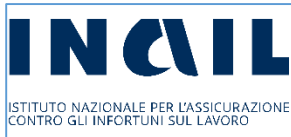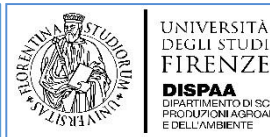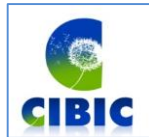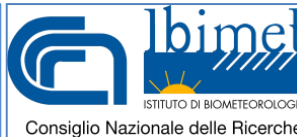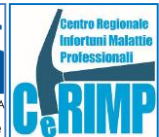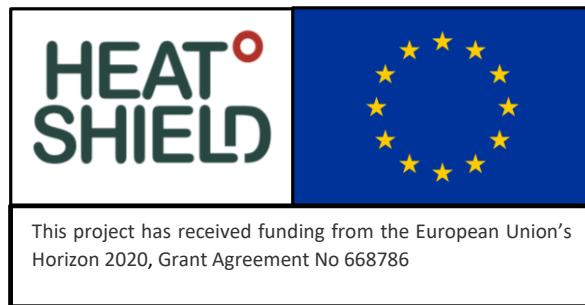

**General anonymous questionnaire:- workers' risk perception of heat stress in the workplace**

**ID** .....

**Gender**

Male

Female

**Date of birth:** ...../...../.....

**Birth place:** .....

**Country where you work**.....

**Height (cm)**.....**Weight (Kg)**.....

**Educational level**

Apprenticeship

Professional school

Secondary school

High school

Bachelor's/master's degree

Phd

Other .....

**Is your income below, above or in the average of the country where you are working?**

Below average                       Average                       Above average

**What effort does your work require?**

- Low (predominantly sitting and engaged in office work)
- Moderate (work supported with hands and arms: driving tractors or other machines, hammering, filing)
- High (intense work with arms and trunk: digging with shovel, sawing, planing, shearing grass by hand)
- Very high (very intense activity; manual handling of heavy loads)

**Are you a seasonal worker?**

Yes                       No

**In which sector do you work?**

- Agricultural
- Construction
- Transportation
- Manufacturing
- Tourism
- Other.....

**How many years have you been working in this sector?**

.....

**How many hours a day do you work outdoors during the summer?**

.....

**How many hours a day do you work indoors during the summer?**

.....

**When you work in an indoor environment, is there a conditioning system?**

Yes

No

I don't know

**Do you usually have work shift?**

Yes

No

**Do you suffer from chronic illnesses (a multiple answer is possible)?**

No

Diabetes

Hypertension

Diseases of the respiratory system

Allergies that are accentuated during particularly hot periods

Kidney diseases

Other .....

**During which work activities do you feel the greater impact of heat wave?**

.....

**What thermal sensation do you feel while working during a heat wave?**

Neither hot nor cold

Slightly hot

Moderately hot

Hot

Very hot

**What impact does a heat wave have on your work (a multiple answer possible)?**

No impact

Impact on well-being

Impact on concentration

Impact on productivity

Health impact

Other.....

**Do you experience a drop in productivity during a heat wave?**

- No
- Yes, about 10%
- Yes, from 10 to 30%
- Yes, more than 30%

**Have you ever been informed, by your employer or your manager, on how to behave in your work activities in the event of a heat wave (a multiple answer is possible)?**

- No
- Yes, leaflet
- Yes, orally
- Si, posters
- Si, safety courses
- Other.....

**Receive warnings from your employer or manager about the possibility of a heat wave occurring (a multiple answer is possible)?**

- No
- Yes, leaflet
- Yes, orally
- Yes, posters
- Other.....

**Are you satisfied / dissatisfied with the measures taken at the workplace to reduce the effects of heat?**

- Very dissatisfied
- Dissatisfied
- I don't know
- Satisfied
- Very satisfied

**What symptoms do you usually experience during the summer (a multiple answer is possible)?**

- None
- Excessive sweating

- Tiredness / weakness
- Thirst
- Dizziness
- Disorder
- Stress increasing
- Discomfort
- Other.....

**Have you ever been affected by the following diseases or symptoms during a heat wave (a multiple answer is possible)?**

- Headache
- Weakness
- Rash
- Muscle cramps
- Fainting (heat syncope)
- Nausea or vomiting
- Heat cramps
- Heart attack
- None of the previous ones
- Other.....

**Have you ever been hospitalized for one of the problems listed above?**

- Yes                       No

**If you answered YES to the previous question, specify which one.**

.....

**Does your work require a special clothing (for example, for reasons of protection or safety)?**

- No
- Yes but does not accentuate the heat discomfort during a heat wave
- Yes, It is determined an accentuation of the heat discomfort during a heatwave

**How do you try to reduce exposure to heat (a multiple answer is possible)?**

- The exposure can not be reduced
- Increasing the number of breaks
- Using a cooler place for breaks (eg place in shade)
- Wearing more suitable clothes (light and breathable clothing)
- Drinking more water
- Moving work activities early in the morning or in the evening
- Other.....
